# Supplementary material for: New Cytotoxic Sesquiterpenoids from Siegesbeckia glabrescens
Source: MDPI journal article supplement (doi:10.3390/molecules20022850), 2015-02-10
Supplement: s1 [file s1]

# Supplementary Materials

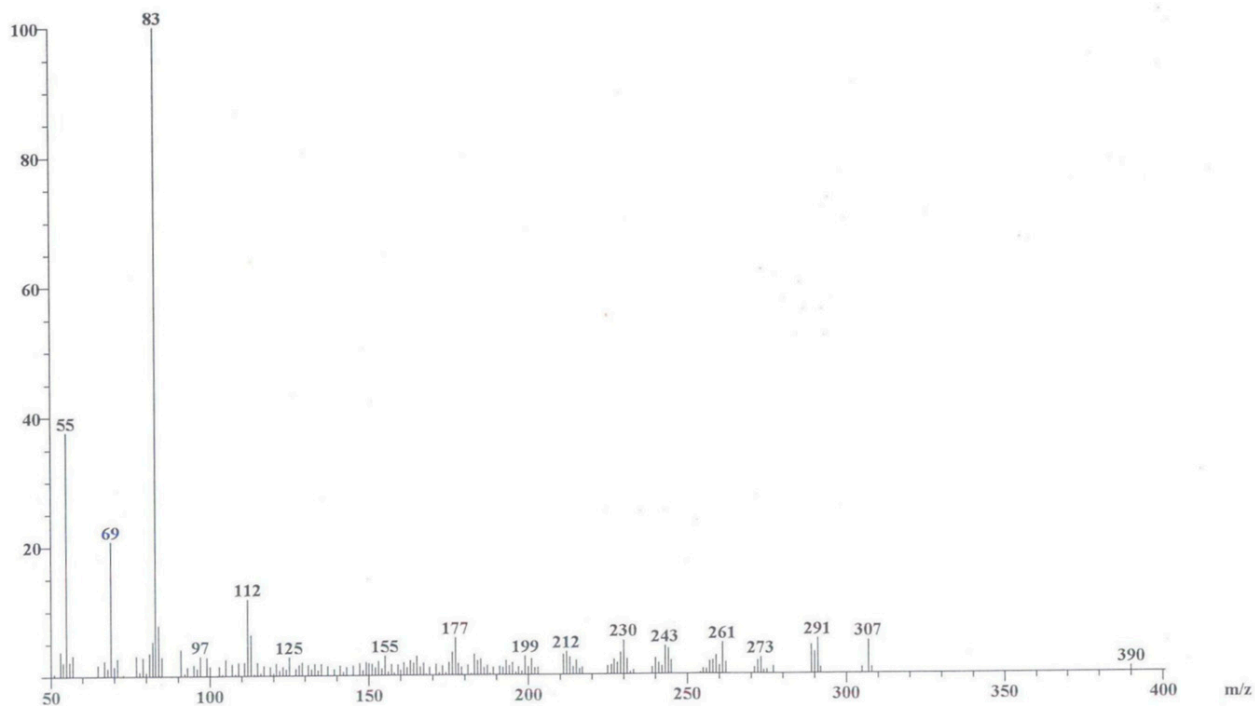

**Figure S1.** EIMS spectrum of compound 1.

File: 9441  
Sample: sig-Q

Date Run: 12-24-2012  
Ionization mode: EI+

Time Run: 15:22:40

Instrument: JEOL JMS600  
Inlet: Direct Probe

R.T.: 1:14.05

Scan: 50-65  
Base: m/z 343; 59.5%FS

TIC: 4544086

Selected Isotopes :  $C_{0.50}H_{0.100}O_{0.10}$

Error Limit : 20 ppm

| <u>Measured Mass</u> | <u>% Base</u> | <u>Formula</u>    | <u>Calculated Mass</u> | <u>Error</u> |
|----------------------|---------------|-------------------|------------------------|--------------|
| 390.1685             | 0.2%          | $C_{28}H_{22}O_2$ | 390.1620               | -17.0        |
|                      |               | $C_{21}H_{26}O_7$ | 390.1678               | -1.7         |

**Figure S2.** HREIMS spectrum of compound 1.

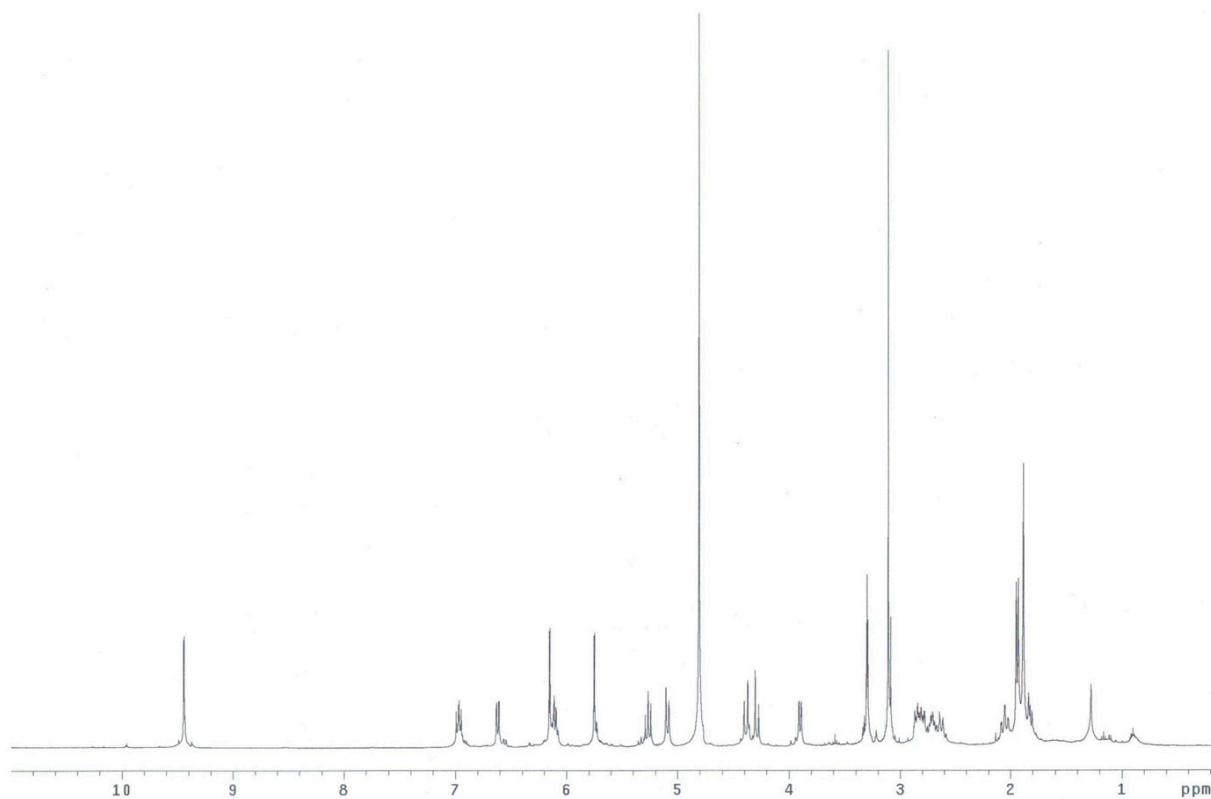

**Figure S3.**  $^1\text{H-NMR}$  (400 MHz) spectrum of compound **1** in  $\text{CD}_3\text{OD}$ .

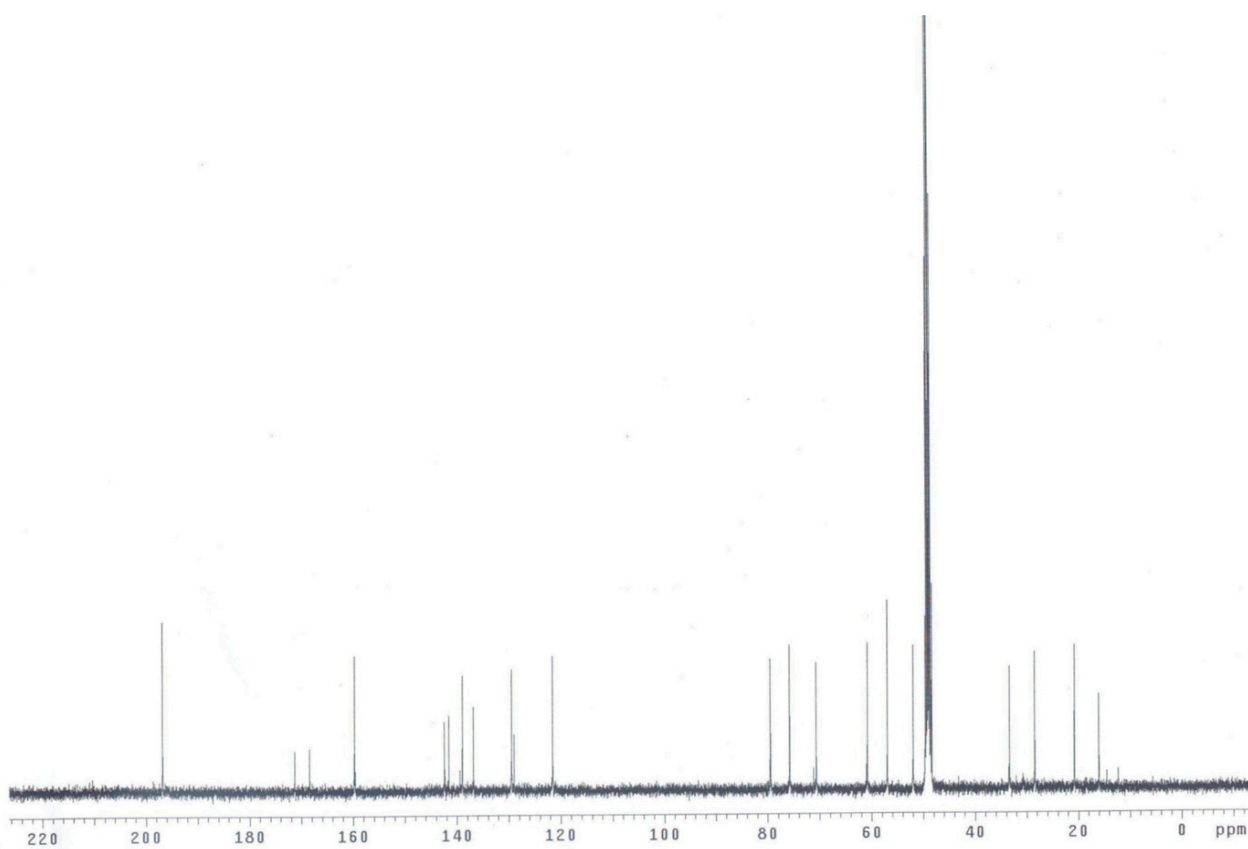

**Figure S4.**  $^{13}\text{C-NMR}$  (100 MHz) spectrum of compound **1** in  $\text{CD}_3\text{OD}$ .

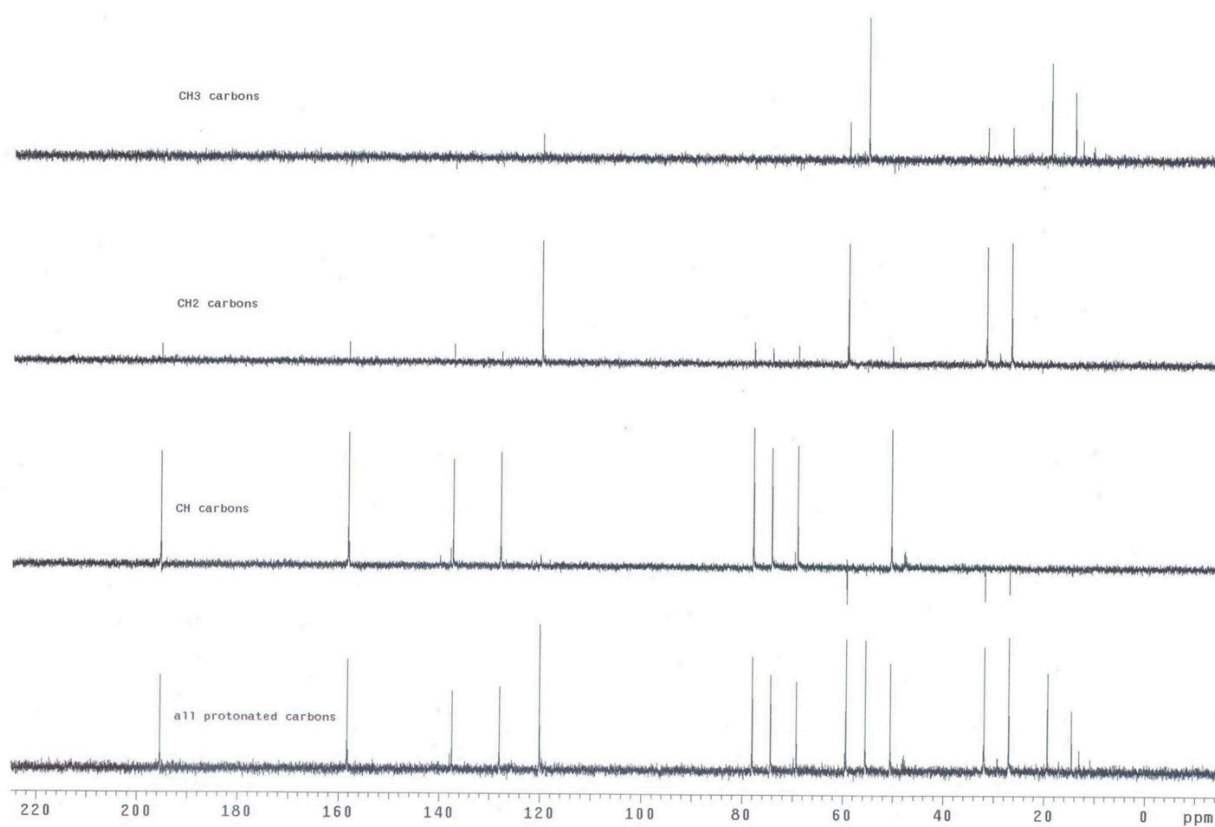

Figure S5. DEPT spectrum of compound 1 in CD<sub>3</sub>OD.

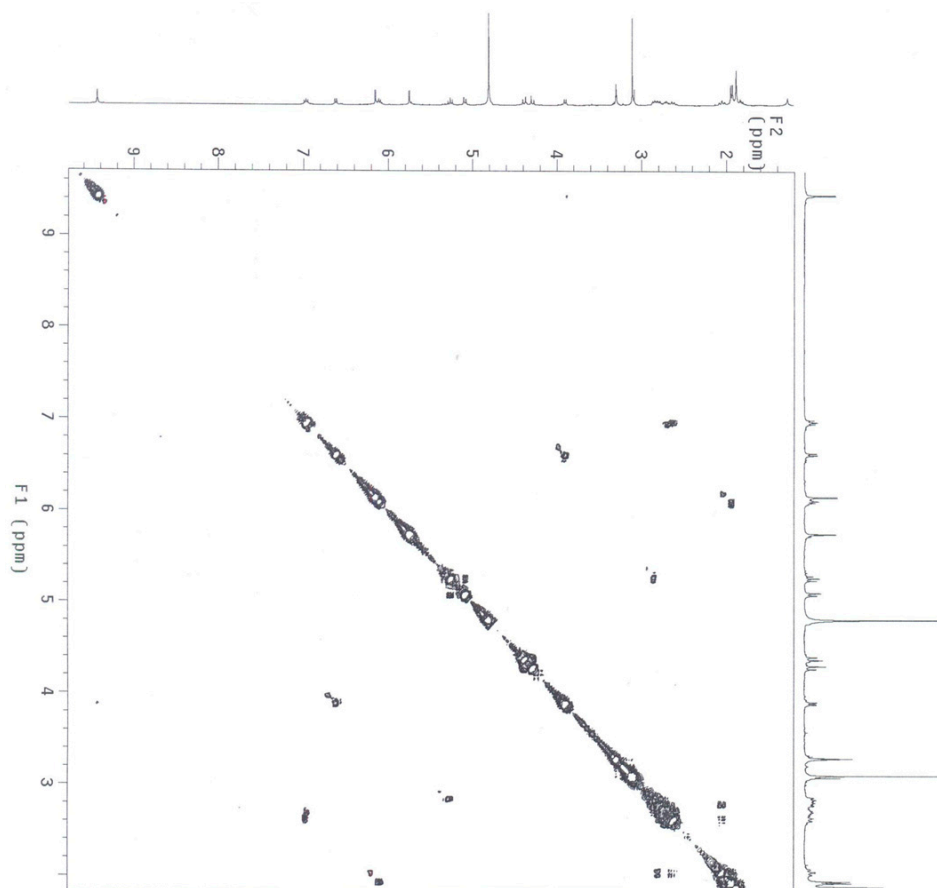

Figure S6. <sup>1</sup>H-<sup>1</sup>H COSY spectrum of compound 1 in CD<sub>3</sub>OD.

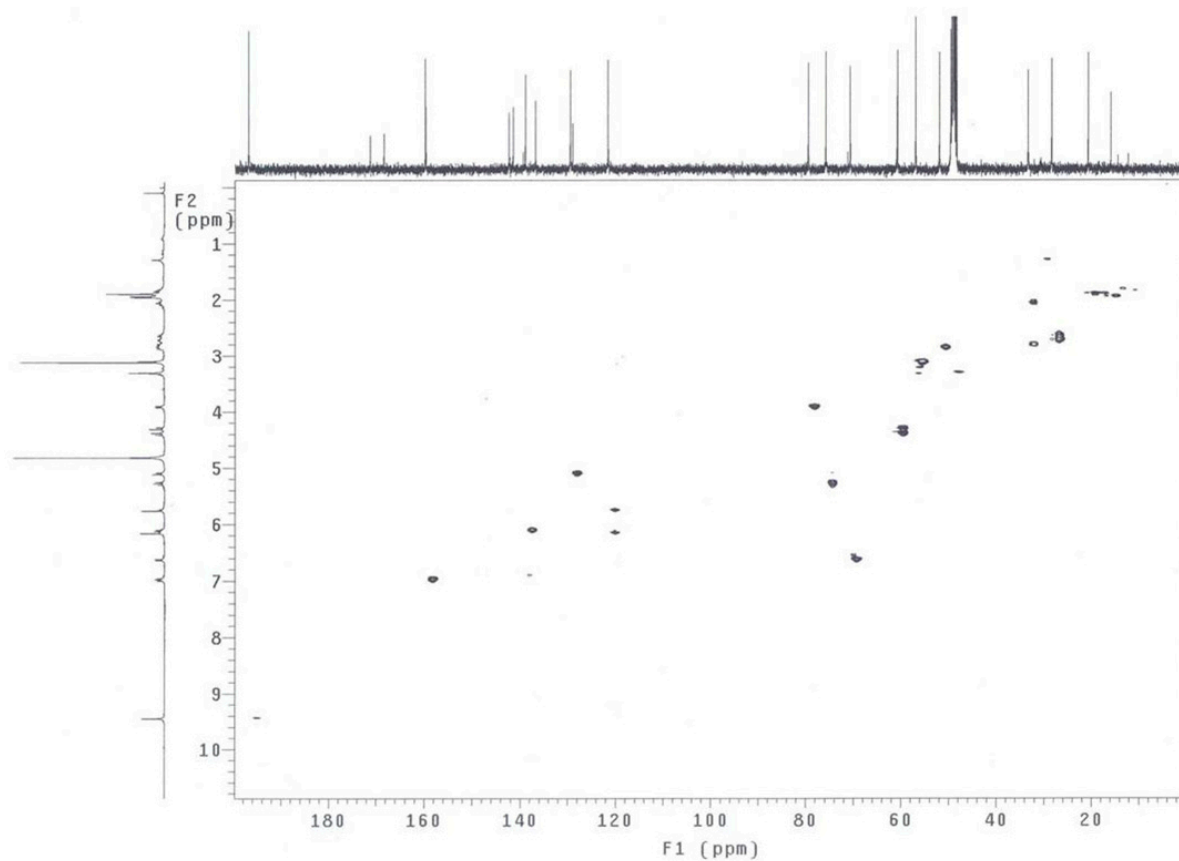

**Figure S7.** HSQC spectrum of compound **1** in CD<sub>3</sub>OD.

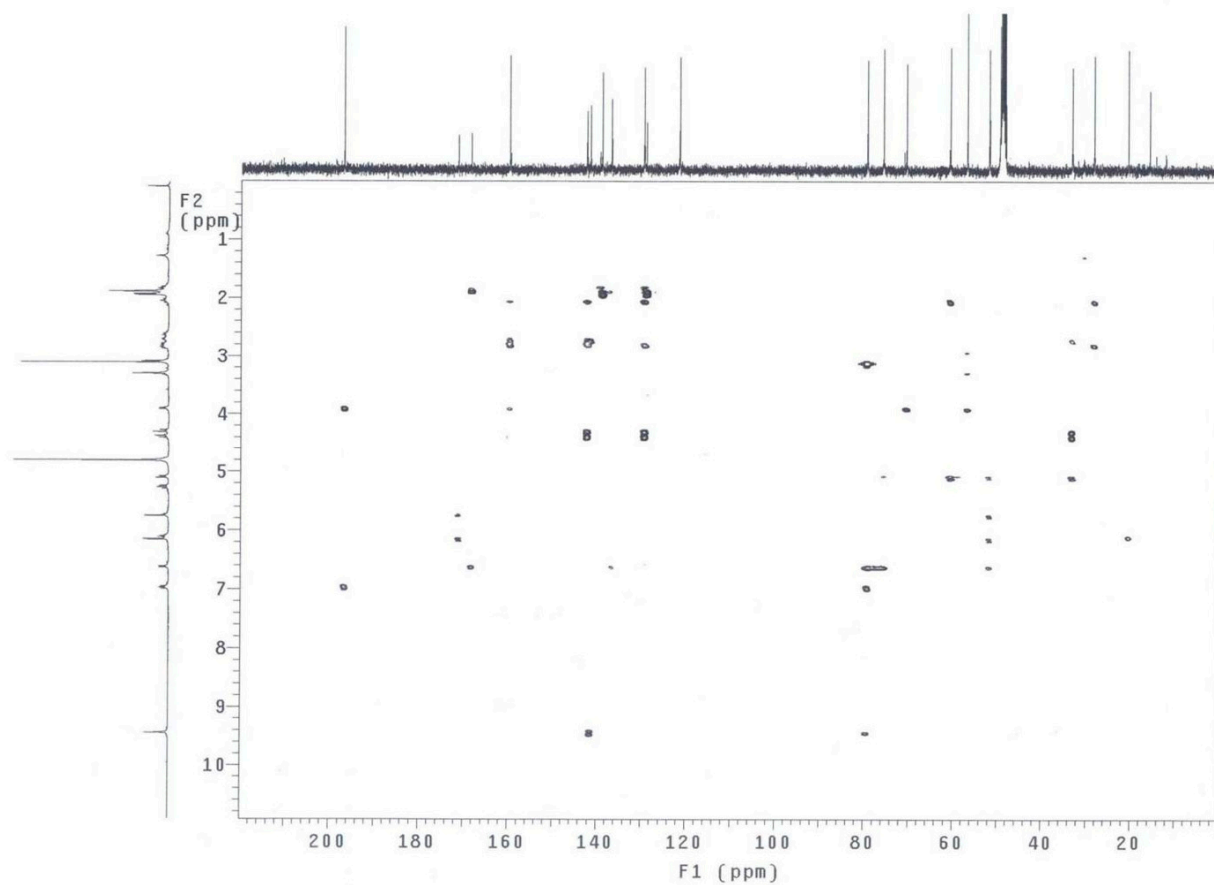

**Figure S8.** HMBC spectrum of compound **1** in CD<sub>3</sub>OD.

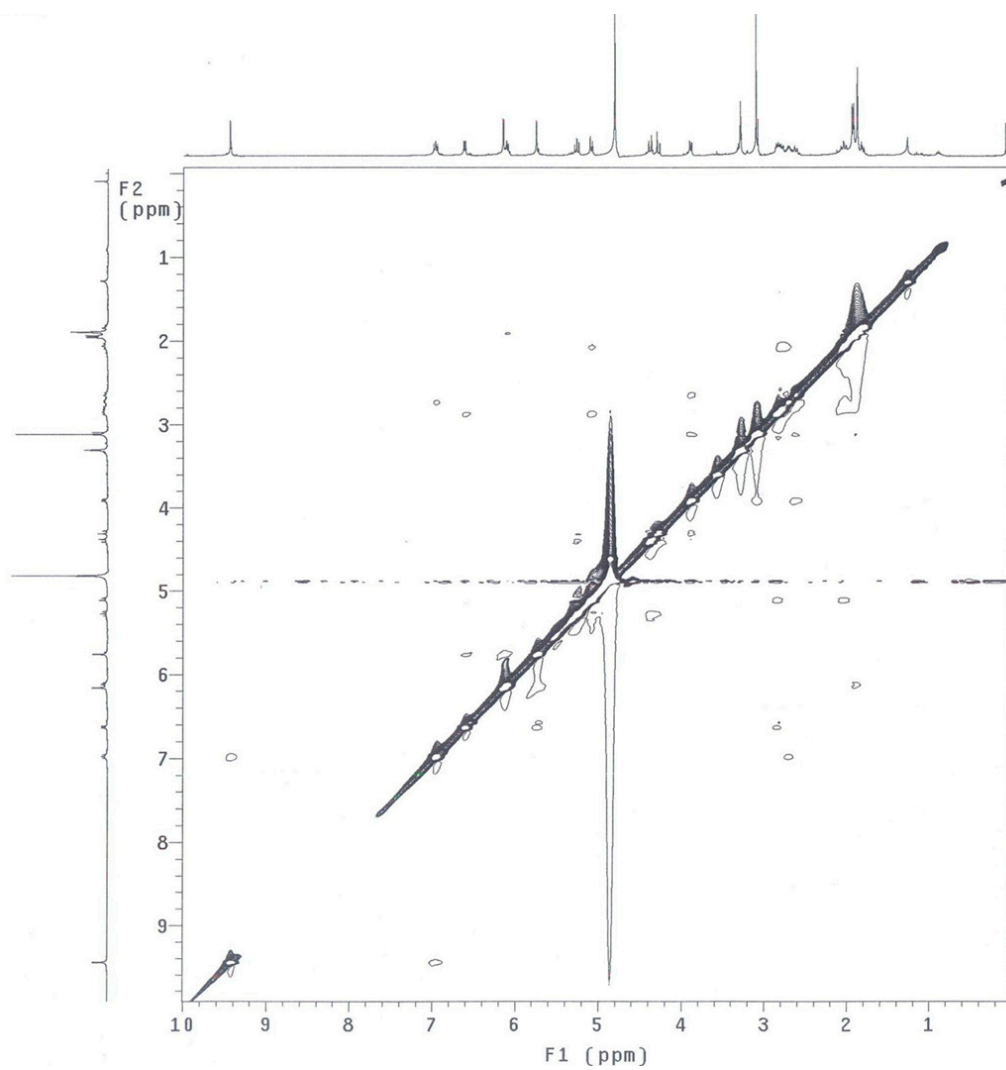

**Figure S9.** NOESY spectrum of compound **1** in CD<sub>3</sub>OD.

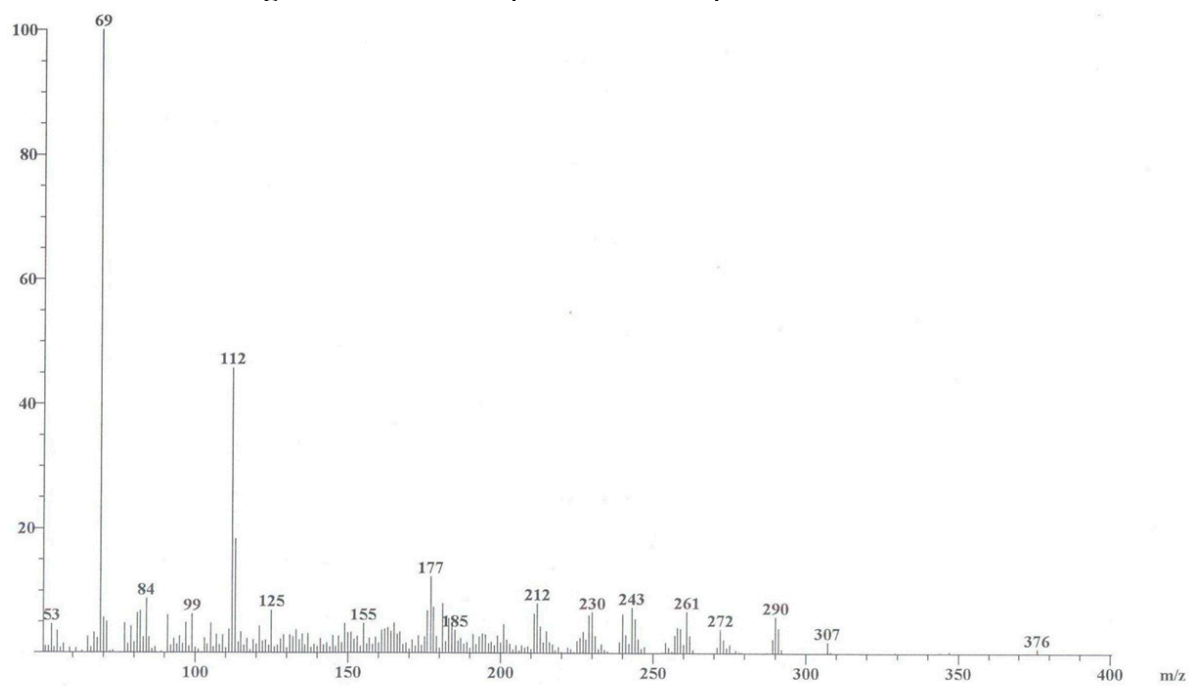

**Figure S10.** EIMS spectrum of compound **2**.

File: 9442  
Sample: sig-L

Date Run: 12-24-2012  
Ionization mode: EI+

Time Run: 15:50:18

Instrument: JEOL JMS600  
Inlet: Direct Probe

R.T.: 2:12.35

Scan: 85-120  
Base: m/z 419; 5.6%FS

TIC: 1607109

Selected Isotopes :  $C_{0.50}H_{0.100}O_{0.10}$

Error Limit : 20 ppm

| <u>Measured Mass</u> | <u>% Base</u> | <u>Formula</u>    | <u>Calculated Mass</u> | <u>Error</u> |
|----------------------|---------------|-------------------|------------------------|--------------|
| 376.1518             | 13.6%         | $C_{27}H_{20}O_2$ | 376.1463               | -15.0        |
|                      |               | $C_{20}H_{24}O_7$ | 376.1522               | 1.1          |

**Figure S11.** HREIMS spectrum of compound **2**.

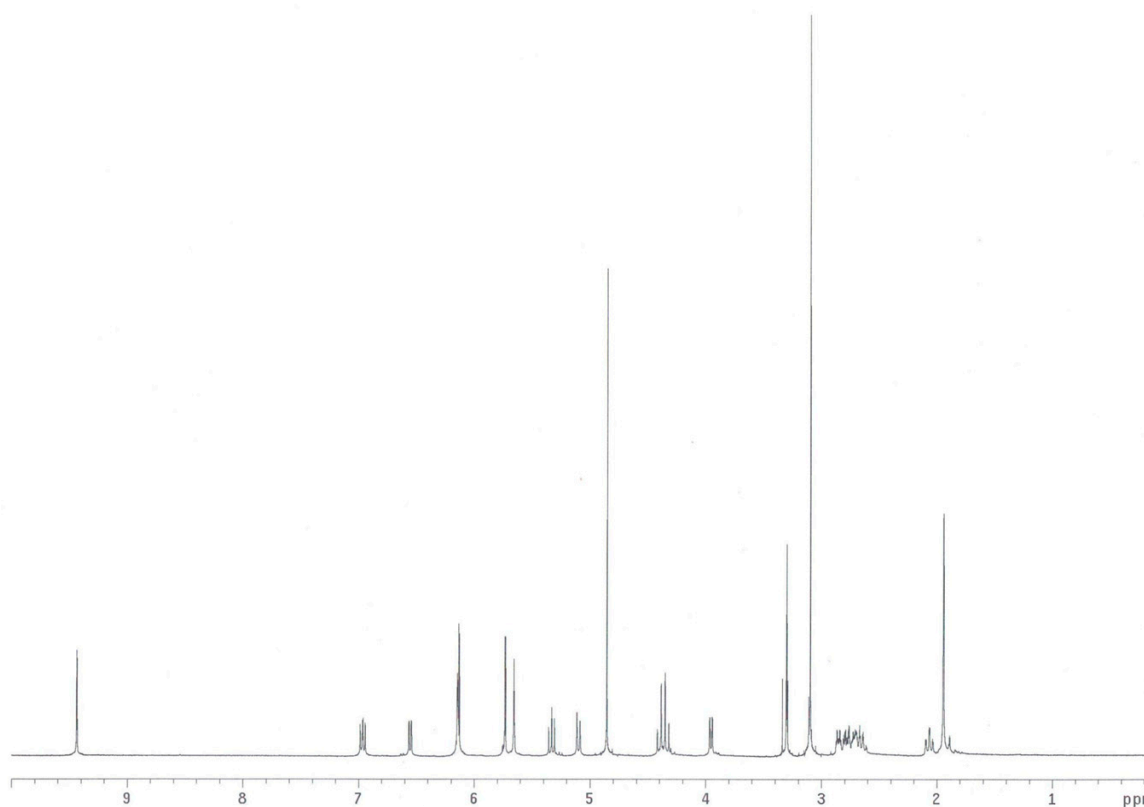

**Figure S12.**  $^1H$ -NMR (400 MHz) spectrum of compound **2** in  $CD_3OD$ .

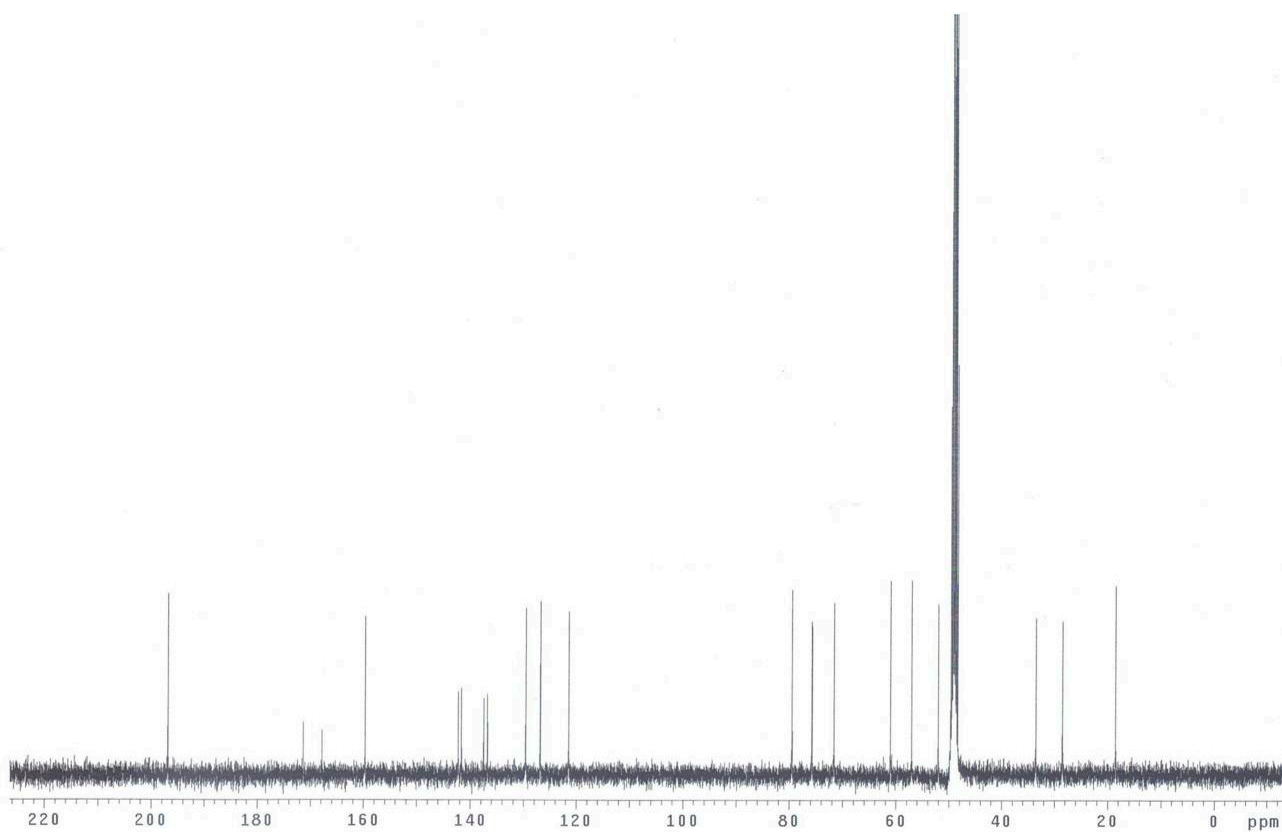

**Figure S13.**  $^{13}\text{C}$ -NMR (100 MHz) spectrum of compound 2 in  $\text{CD}_3\text{OD}$ .

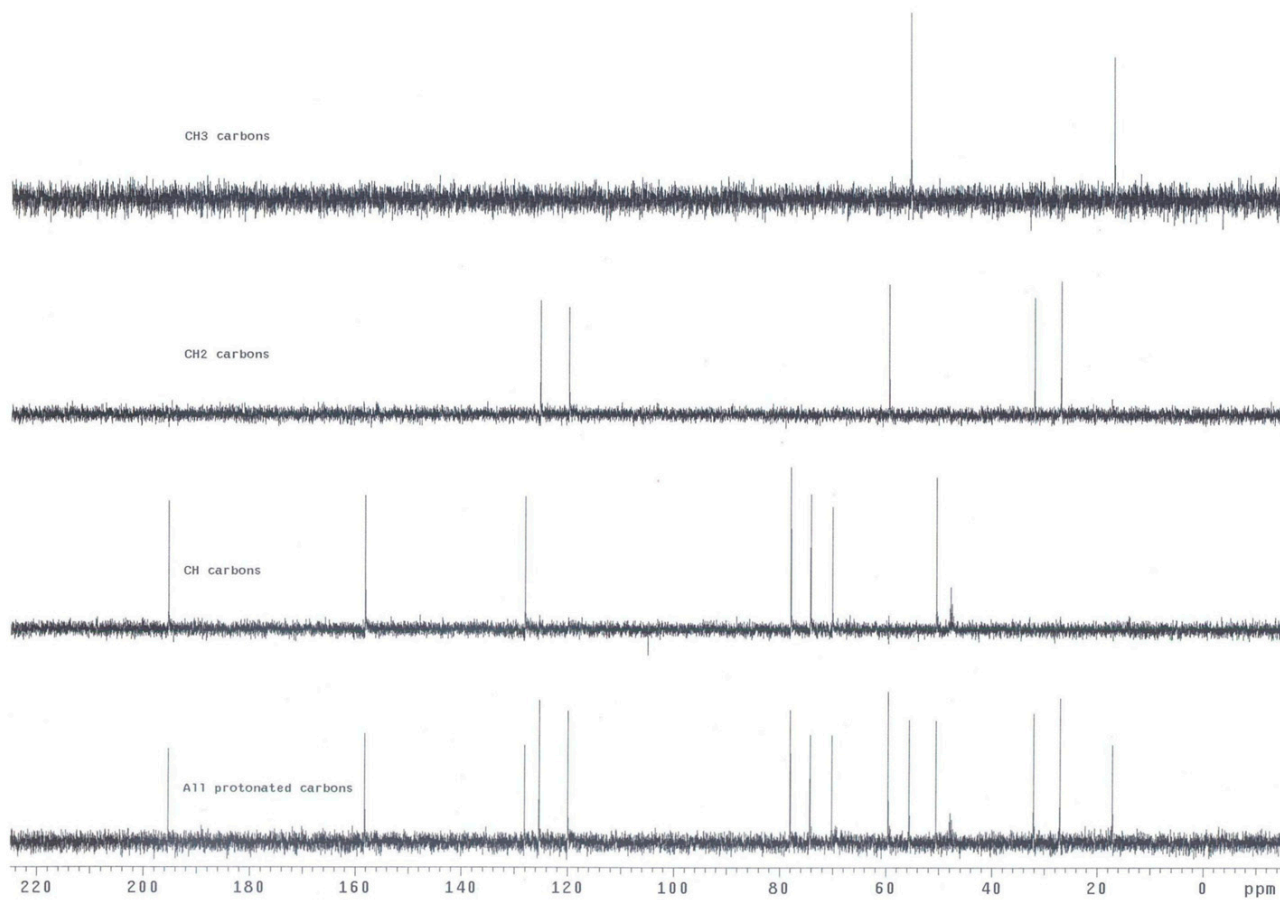

**Figure S14.** DEPT spectrum of compound 2 in  $\text{CD}_3\text{OD}$ .

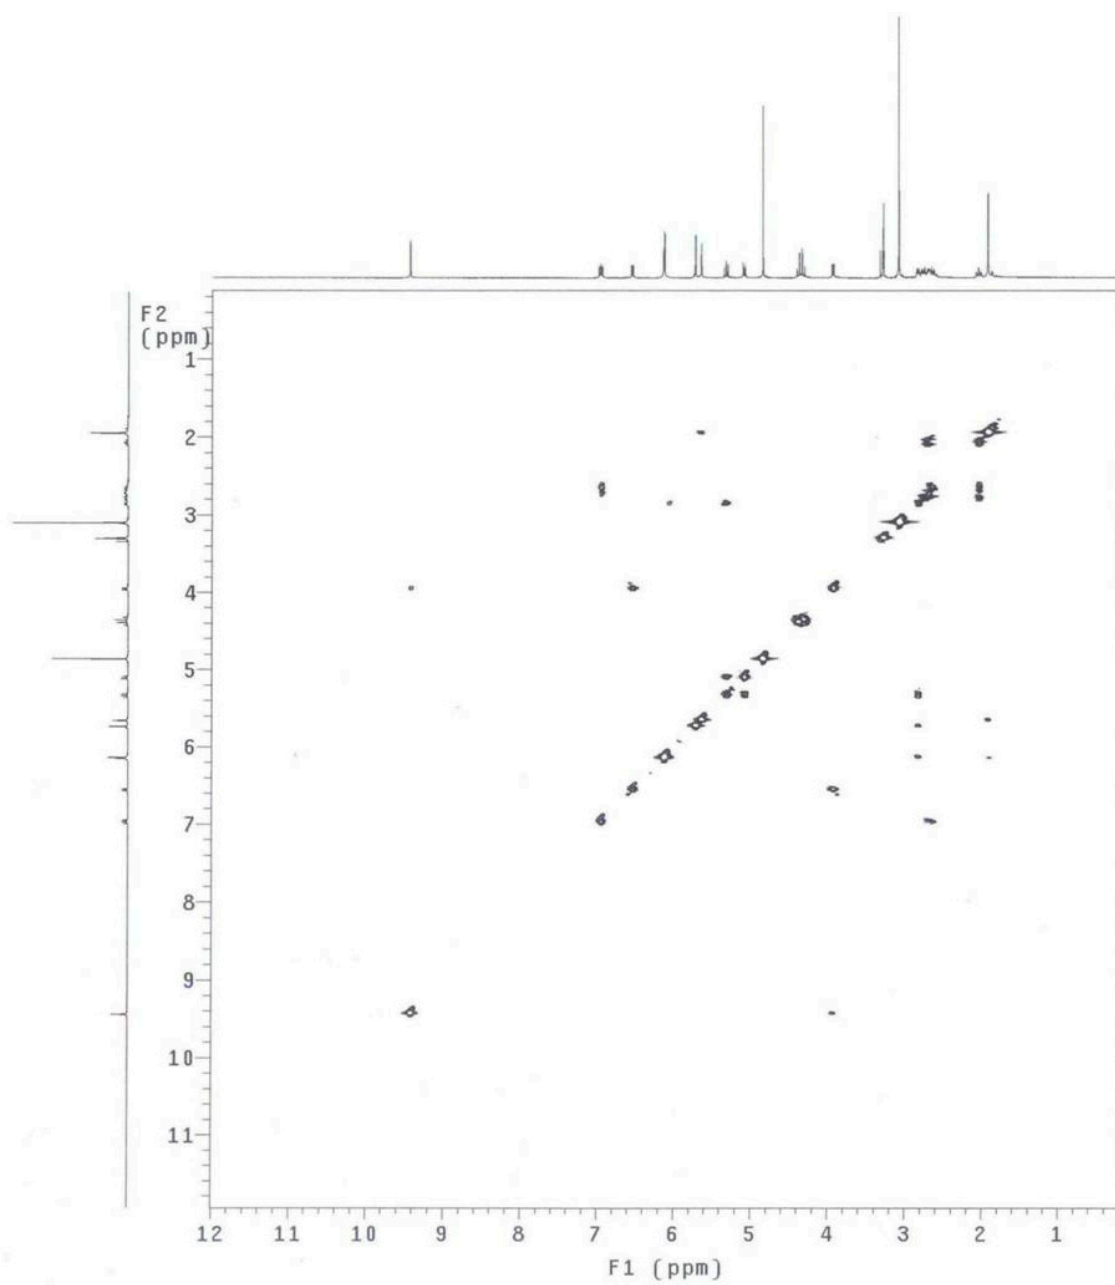

**Figure S15.**  $^1\text{H}$ - $^1\text{H}$  COSY spectrum of compound **2** in  $\text{CD}_3\text{OD}$ .



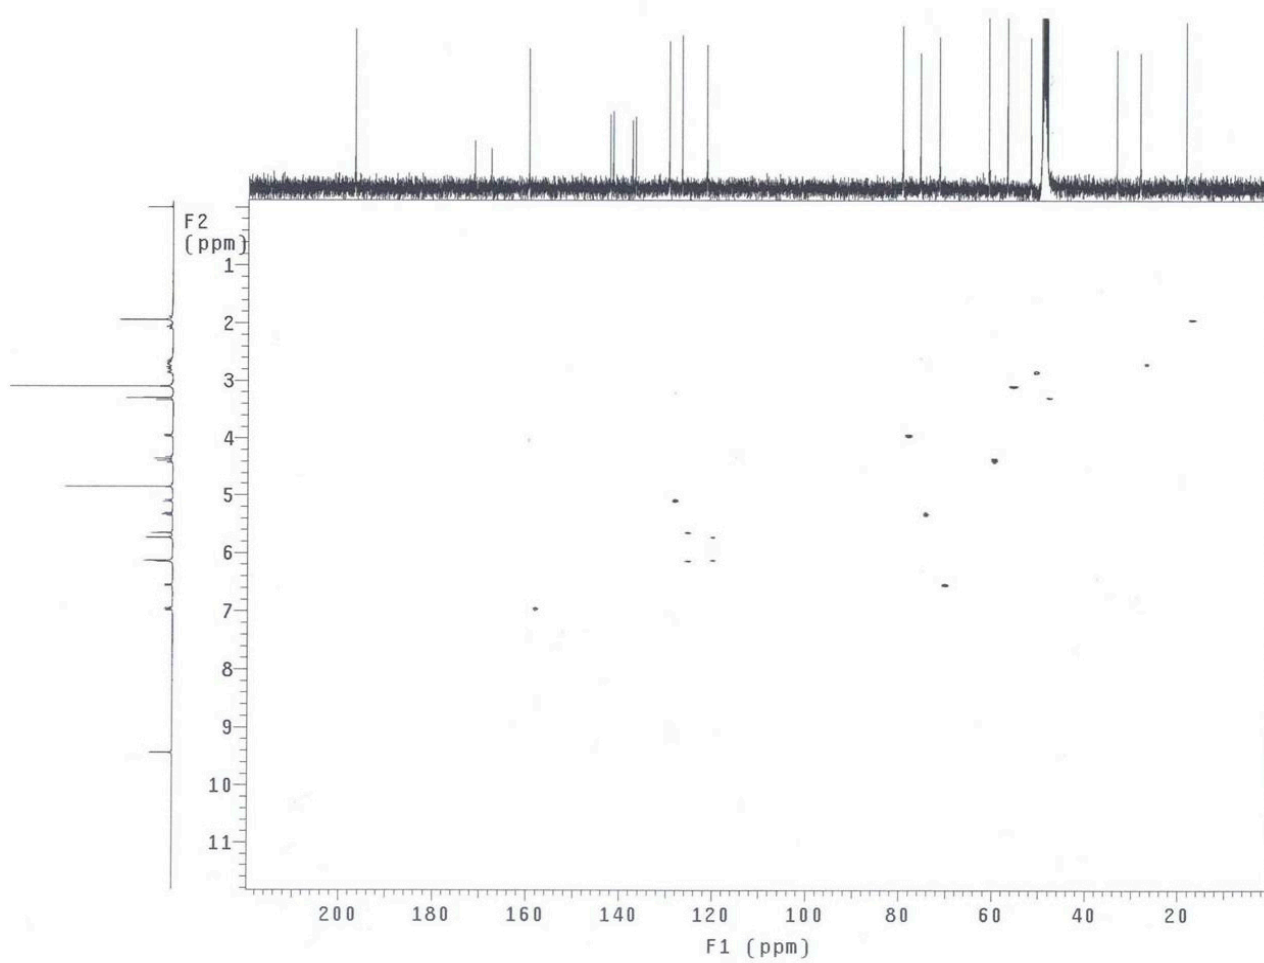

**Figure S16.** HSQC spectrum of compound **2** in  $\text{CD}_3\text{OD}$ .

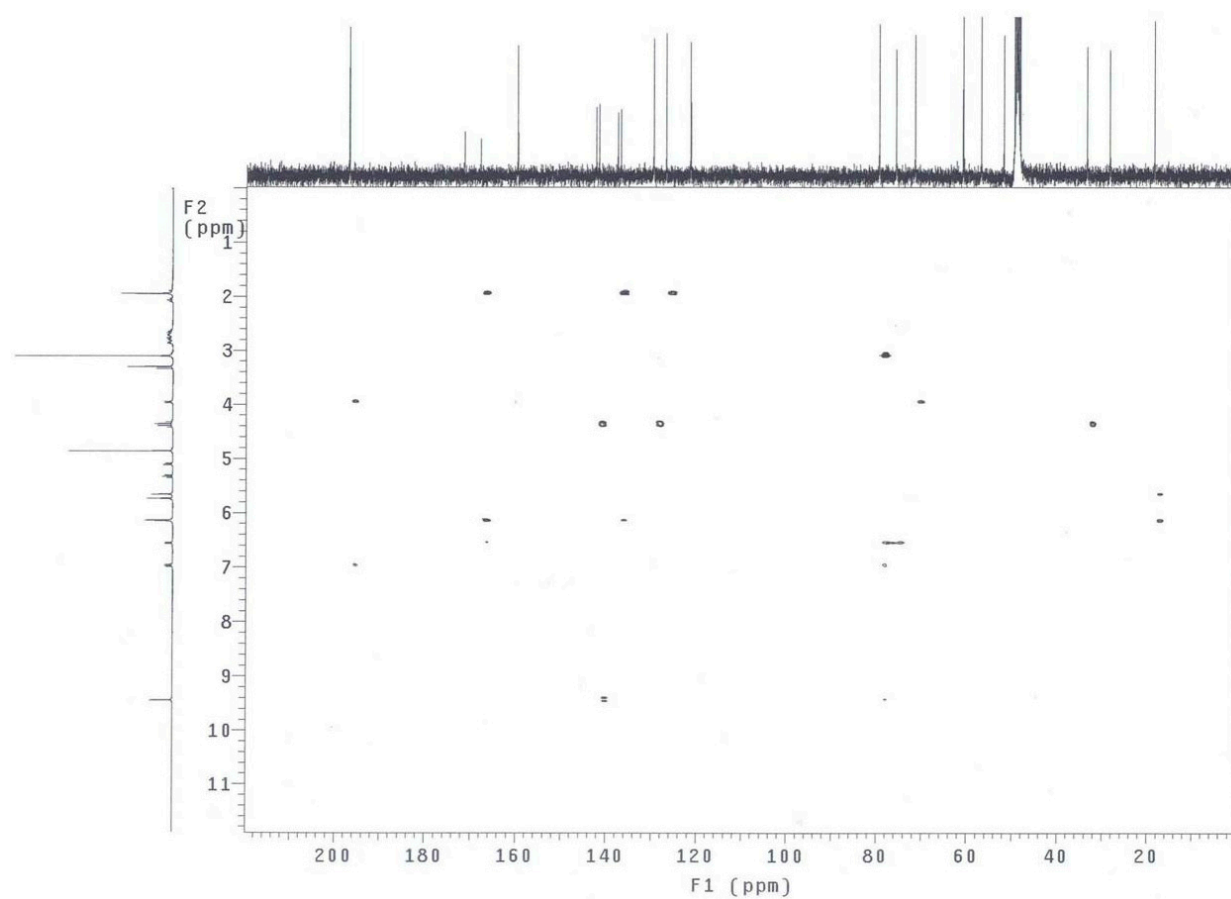

**Figure S17.** HMBC spectrum of compound **2** in CD<sub>3</sub>OD.

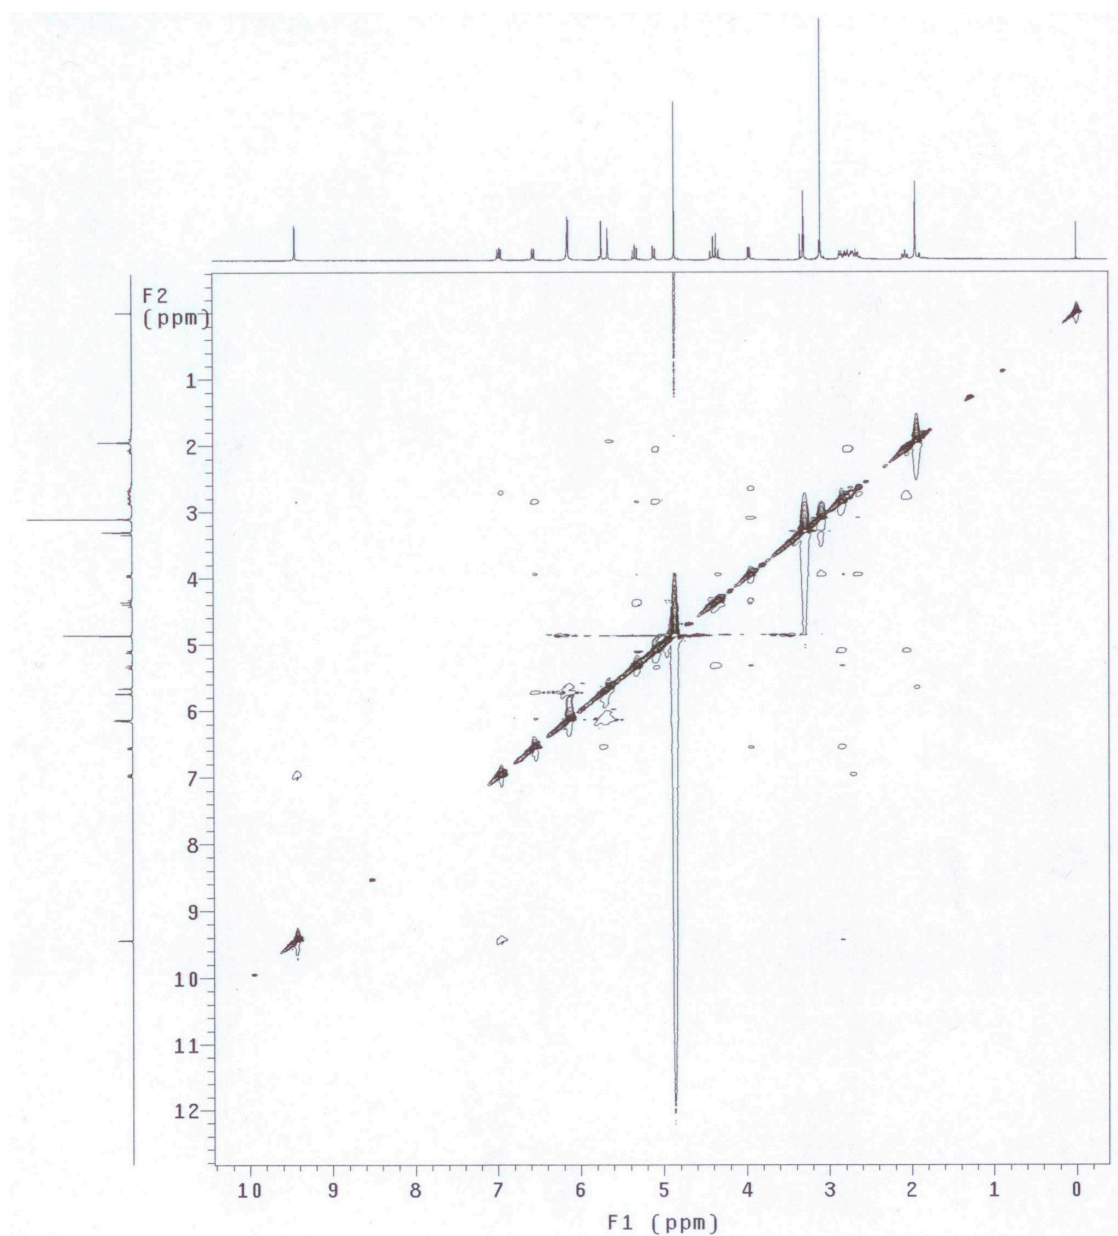

**Figure S18.** NOESY spectrum of compound **2** in CD<sub>3</sub>OD.
